# Disturbances in Pro-Oxidant-Antioxidant Balance after Passive Body Overheating and after Exercise in Elevated Ambient Temperatures in Athletes and Untrained Men

Wanda Pilch<sup>1</sup>, Zbigniew Szygula<sup>2</sup>, Anna K. Tyka<sup>3,6\*</sup>, Tomasz Palka<sup>1</sup>, Aleksander Tyka<sup>1</sup>, Tomasz Cison<sup>1,6</sup>, Pawel Pilch<sup>4</sup>, Aneta Teleglow<sup>5</sup>

**1** Department of Physiology and Biochemistry, University School of Physical Education, Cracow, Poland, **2** Department of Sports Medicine, University School of Physical Education, Cracow, Poland, **3** Department of Recreation and Biological Regeneration, University School of Physical Education, Cracow, Poland, **4** Rydygier Memorial Hospital, Cracow, Poland, **5** Department of Clinical Rehabilitation, University School of Physical Education, Cracow, Poland, **6** Institute of Physical Education, State Higher Vocational School, NowySącz, Poland

## Abstract

The aim of the study was to investigate pro-oxidant-antioxidant balance in two series of examinations with two types of stressors (exogenous heat and the combined exogenous and endogenous heat) in trained and untrained men. The exogenous stressor was provided by Finnish sauna session, whereas the combined stressor was represented by the exercise in elevated ambient temperature. The men from the two groups performed the physical exercise on a cycle ergometer with the load of  $53 \pm 2\%$  maximal oxygen uptake at the temperature of  $33 \pm 1^\circ\text{C}$  and relative humidity of 70% until their rectal temperature rose by  $1.2^\circ\text{C}$ . After a month from completion of the exercise test the subjects participated in a sauna bathing session with the temperature of  $96 \pm 2^\circ\text{C}$ , and relative humidity of  $16 \pm 5\%$ . 15-minutes heating and 2-minute cool-down in a shower with the temperature of  $20^\circ\text{C}$  was repeated until rectal temperature rose by  $1.2^\circ\text{C}$  compared to the initial value. During both series of tests rectal temperature was measured at 5-minute intervals. Before both series of tests and after them body mass was measured and blood samples were taken for biochemical tests. Serum total protein, serum concentration of lipid peroxidation products and serum antioxidants were determined. The athletes were characterized by higher level of antioxidant status and lower concentration of lipid peroxidation products. Physical exercise at elevated ambient temperature caused lower changes in oxidative stress indices compared to sauna bathing. Sauna induced a shift in pro-oxidant-antioxidant balance towards oxidation, which was observed less intensively in the athletes compared to the untrained men. This leads to the conclusion that physical exercise increases tolerance to elevated ambient temperature and oxidative stress.

**Citation:** Pilch W, Szygula Z, Tyka AK, Palka T, Tyka A, et al. (2014) Disturbances in Pro-Oxidant-Antioxidant Balance after Passive Body Overheating and after Exercise in Elevated Ambient Temperatures in Athletes and Untrained Men. PLoS ONE 9(1): e85320. doi:10.1371/journal.pone.0085320

**Editor:** Harm Bogaard, VU University Medical Center, Netherlands

**Received:** June 4, 2013; **Accepted:** December 4, 2013; **Published:** January 20, 2014

**Copyright:** © 2014 Pilch et al. This is an open-access article distributed under the terms of the Creative Commons Attribution License, which permits unrestricted use, distribution, and reproduction in any medium, provided the original author and source are credited.

**Funding:** The source of funding for this work was The University School of Physical Education in Cracow, Poland, University Grant No. AWF/1/7/2011. The funders had no role in study design, data collection and analysis, decision to publish, or preparation of the manuscript.

**Competing Interests:** The authors have declared that no competing interests exist.

\* E-mail: anna.tyka@awf.krakow.pl

## Introduction

Pro-oxidant-antioxidant balance (PAB) is a state of dynamic balance established under conditions of homeostasis between free radicals that are created and those consumed (scavenged) [1]. This definition concerns cells, body fluids or other human body components. This equilibrium is subjected to permanent dynamic changes caused either by physiological (physical exercise) [2] or pathological factors (illness, presence of xenobiotics or UV radiation) [1]. Physical exercise of great intensity involves muscle damage, which is caused by free radicals that contribute to a more intensive lipid peroxidation [3], [4]. Studies have demonstrated that exercise-induced oxidative damage depends on exercise intensity and duration [5], [6]. One of the elements of body adaptation to regular exercise is elevated concentration of antioxidants, also observed after training sessions [2], [7]. Increased oxidative stress is induced by an increased production of free radicals, reduced number of scavengers and decreased activity of enzymatic systems responsible for their removal, which

often coexist with each other [8]. In the active muscle oxidative stress is generated when aerobic metabolism is increased due to the production of reactive oxygen and nitrogen species (RONS) [1].

An important factor which promotes oxidative processes is an increased core body temperature [8]. Physical exercise performed in the a environment leads to considerable dehydration [9] and oxidative stress [10]. Both factors negatively impact the exercise efficiency. Furthermore passive body overheating also shifts the pro-oxidant-antioxidant balance towards oxidation [8].

For this reason the authors emphasized thermal factor when defining research problems. However at this time it is not clear how both factors: passive overheating induced by sauna bathing and physical exercise in elevated ambient temperature modify pro-oxidant-antioxidant balance in human body.

Therefore we conducted this study to investigate modifications in pro-oxidant-antioxidant balance due to only exogenous heat and the combination of exogenous and endogenous heat in athletes and untrained men.

## Materials and Methods

All the men, who took part in the study were fully informed about the protocol and risks associated with the experimental procedure. Being aware of their rights, expressed in the Declaration of Helsinki, all participants have signed the consent to participate in the study. The experiment was approved by the Bioethics Committee for Clinical Research at the Regional Medical Chamber in Cracow, Poland (No. 202KBL/OIL/2011).

### Subjects

Two groups of 10 men took part in the study. They were volunteers, aged  $22 \pm 0.50$  years (Table 1) without any health problems reported in the interview during medical examination and without any contraindications for sauna bathing. The control group (CON) was comprised of untrained men who practised recreational sports. The study group (A) was comprised of professional long distance runners ( $>5$  km) who had similar training experience ( $6 \pm 1.2$  years). Mean body mass of the untrained men was 73.4 kg, mean body height was 176.4 cm, mean fat percentage was 10.2% and BMI was  $23.6 \text{ kg.m}^{-2}$ . The athletes were characterized by the following anthropometric indices: mean body height: 179 cm, mean body mass: 67.7 kg, mean fat percentage: 7.1% and BMI of  $21.2 \text{ kg.m}^{-2}$ . The athletes had considerably lower body mass and significantly lower body fat percentage than the untrained men ( $p < 0.05$ ). The athletes exhibited significantly higher ( $p < 0.05$ )  $\text{VO}_2\text{max}$  per kg of body mass and significantly higher ( $p < 0.05$ ) respiratory minute volume ( $V_E$ ). These indices in athletes were:  $\text{VO}_2\text{max} = 60.5 \text{ ml.kg}^{-1}.\text{min}^{-1}$  and  $V_E = 118 \text{ l.min}^{-1}$  and respectively in the untrained men:  $\text{VO}_2\text{max} = 44.5 \text{ ml.kg}^{-1}.\text{min}^{-1}$  and  $V_E = 147 \text{ l.min}^{-1}$ . Two weeks before and during the examinations, the participants did not intake caffeine, alcohol, dietary supplements and vitamins. They also did not take sauna baths on regular basis.

### Research Protocol

Before the main examinations started, the authors carried out the measurements of the following biometric and structural body indices: body height (BH), body mass (BM), skinfold thickness (suprascapular and triceps skinfold). The results obtained from skinfolds measurements were used for calculation of fat percentage (PF) according to the Slaughter et al. formula [11]. The measurements of body height and mass were used for calculation of body mass index (BMI) according to DuBois and DuBois [12].

The men from both study groups started the primary examinations that comprised of two series.

1. In the first series (1) the effect of physical exercise in elevated ambient temperature  $33 \pm 1^\circ\text{C}$  on changes in selected physio-

logical indices and changes in the indices of oxidative stress were measured in the men studied.

2. The second series (2) evaluated the effect of passive body overheating during Finnish sauna bathing (temperature of  $96 \pm 2^\circ\text{C}$ ) on changes in the same indices as in the first series of studies.

Individual resistance loads for all men were adjusted before the first series, using the method proposed by Nielsen et al. [13]. Study design is shown in Figure 1.

The participants (A) and (CON) started the test in the morning (between 8:00 and 11:00 a.m.) after a light breakfast and after previous defecation.

The men had one-week rest after the trials when  $\text{VO}_2\text{max}$  was determined and suitable resistance load was adjusted, then they performed the test which evaluated the efficiency of exercise-related thermoregulatory mechanisms (first series) [14]. The test procedure was pedalling on a cycle ergometer with individual resistance load determined during initial examinations ( $53 \pm 2\% \text{VO}_2\text{max}$ ). The exercise test was performed on a cycle ergometer ER 900 D – 72475 BIT 2 (Jaeger, Germany). The exercise was carried out in the climatic chamber at the temperature of  $33 \pm 1^\circ\text{C}$  and relative humidity of 70% until rectal temperature rose by  $1.2^\circ\text{C}$ . During the exercise men were wearing shorts and athletic footwear.

The second series was carried out after a month. It consisted in passive heating of the subjects' bodies in Finnish sauna with the temperature  $96 \pm 2^\circ\text{C}$  at face level and the relative humidity of  $16 \pm 5\%$ . Men stayed for 15 minutes in a hot sauna chamber in a reclining position. The sauna session was finished with a 2-minute cool-down in the shower with constant water temperature of  $20^\circ\text{C}$ . These activities (15-minutes heating and 2-minute cool-down) were repeated until subjects' rectal temperature (Tre) rose by  $1.2^\circ\text{C}$  compared to the initial value.

### Measurements

The following indices were measured during the first and the second series of the examinations: body mass (BM) before exercise, before sauna bathing, after the exercise and after sauna bathing. The subjects were weighed naked using Sartorius electronic scales (F 1505 – DZA, Germany).

Rectal temperature (Tre) was monitored in both series at 5-minute intervals using CTD85M electric thermometer (Ellab, Denmark) with the accuracy of  $0.1^\circ\text{C}$ .

### Blood tests and biochemical analyses

Before each series of the examinations (1 and 2) and 3 minutes after them, the heparinised blood samples (15 ml) were taken (always in the same sitting position) to test tubes from the cubital

**Table 1.** Participants' age, duration of exercise test, total work, maximal oxygen uptake, respiratory minute volume and duration of sauna bathing session in untrained men (CON) and athletes (A).

| Group<br>(Mean $\pm$ SD) | Age<br>(years) | Duration of<br>exercise test<br>(minutes) | Maximal oxygen<br>uptake [ $\text{VO}_2\text{max}$ ]<br>( $\text{ml.kg}^{-1}.\text{min}^{-1}$ ) | Respiratory minute<br>volume [ $V_E$ ]<br>( $\text{l.min}^{-1}$ ) | Total work<br>[TW]<br>(kJ) | Duration of<br>sauna bath<br>(minutes) |
|--------------------------|----------------|-------------------------------------------|-------------------------------------------------------------------------------------------------|-------------------------------------------------------------------|----------------------------|----------------------------------------|
| /CON/                    | $22 \pm 0.48$  | $25 \pm 9.10$                             | $44.5 \pm 8.98$                                                                                 | $118 \pm 15.82$                                                   | $167 \pm 51.20$            | $34 \pm 9.30$                          |
| /A/                      | $22 \pm 0.52$  | $31^\# \pm 8.90$                          | $60.5^\# \pm 13.51$                                                                             | $147^\# \pm 36.44$                                                | $269^\# \pm 13.30$         | $31 \pm 9.40$                          |

<sup>#</sup>Significant differences between A and CON at the level of  $p < 0.05$ .

doi:10.1371/journal.pone.0085320.t001

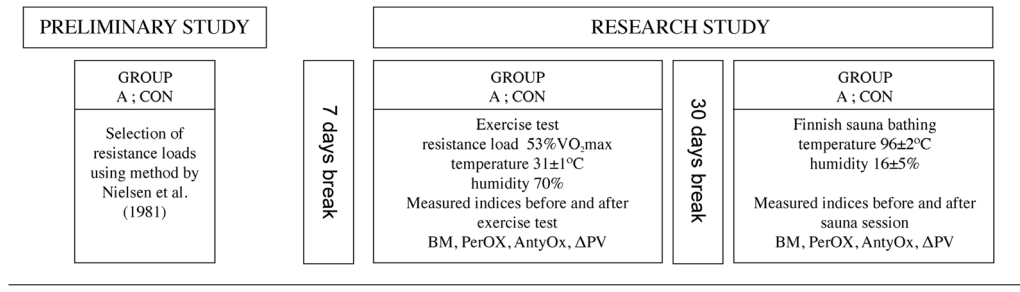

**Figure 1. Study design.**

doi:10.1371/journal.pone.0085320.g001

vein and then centrifuged for 10 minutes in a K-24 centrifuge (Janetzki, Germany). The serum obtained with this method was stored in a refrigerator at the temperature of  $-80^{\circ}\text{C}$ . After completion of all the samples in the serum which was free of haemolysis traces, the following biochemical indices were determined: total protein using biuret method by means of Hitachi 917 Modular P analyser, concentration of lipid peroxidation products (PerOx) and plasma antioxidant concentration (AntyOx) with ImmunDiagnostik tests using ELISA (method sensitivity  $7\ \mu\text{mol.l}^{-1}$ ).

Calculations of the changes in plasma volume ( $\Delta\text{PV}$ ) were made based on the concentration of total protein determined before and after both series of the examinations using the Harrison's formula [15]:

$$\Delta\text{PV} = -100 \cdot [(Bk - Bp) / (Bk)]$$

where: Bp – initial protein determined before the examination, Bk – final protein determined after the examination.

Due to dynamic changes in plasma volume that occur during physical exercise in the climatic chamber and during sauna bathing, the oxidative stress indices, measured after exercise and after sauna exposure to heat, were corrected for plasma volume changes [16] using Kraemer and Brown's formula [17].

$$\text{Wsk} = (\% \Delta\text{PV} \cdot 0.01 \cdot \text{Wpo}) + \text{Wpo}$$

where:  $\text{W}_{\text{sk}}$  – corrected value,  $\text{W}_{\text{po}}$  – value after the exercise or after sauna bathing.

### Statistical Analysis

In order to check normality of data distribution, authors used Shapiro-Wilk test. Student's t test was used for all variables (both dependent and independent) as the results obtained normal distribution. Statistical significance between the means was set at  $p < 0.05$ . The relationships between the individual indices were determined using Pearson's linear correlation coefficients with the statistical significance set at  $p < 0.05$ .

### Results

Mean duration of sauna bathing, until reaching the increase in rectal temperature of  $1.2^{\circ}\text{C}$ , was similar in both groups (A and CON) (Table 1). Mean duration of exercise at intensity of  $53\% \text{VO}_2\text{max}$  in elevated ambient temperature ( $33 \pm 1^{\circ}\text{C}$ ) was significantly longer ( $p < 0.05$ ) in athletes compared to the untrained. The amount of work done during the exercise test was significantly higher ( $p < 0.05$ ) in athletes compared to the untrained (Table 1).

A statistically significant ( $p < 0.05$ ) body mass loss, due to dehydration caused by sweating during sauna bathing, was observed in both groups (Table 2). Statistically significantly higher body mass loss expressed as percentage of the initial body mass was observed in the athletes both after the exercise test and after sauna bathing ( $p < 0.05$ ). These changes amounted on average in athletes to  $(-1.2\%)$  after performing the exercise test and  $(-1.43\%)$  after sauna bathing. Lower percentage body mass loss was recorded in the untrained men. They were respectively  $(-0.72\%)$  after the exercise test and  $(-0.9\%)$  after overheating in sauna.

Both physical exercise in elevated temperature and sauna bathing caused considerably higher decline in plasma volume in the athletes compared to the untrained men ( $p < 0.05$ ) (Table 3).

The athletes' blood before sauna bathing exhibited higher concentration of antioxidant status and twice lower concentrations of lipid peroxidation products compared with the untrained group at  $p < 0.05$  (see Table 4). Exposure to high temperature during sauna bathing reduced antioxidant status in the untrained subject by almost three times ( $p < 0.05$ ) and intensified the process of peroxidation by  $38.4\%$  ( $p < 0.05$ ). The changes caused by sauna bathing in athletes were considerably less intensive and concerned the reduction in plasma antioxidant status by  $20.8\%$  ( $p < 0.05$ ) and increase in concentration of peroxidation products by  $56.2\%$  ( $p < 0.05$ ). Analysis of the indices revealed a negative relationship between reduction in the concentration of plasma antioxidant status in the untrained men and duration of the exercise in elevated ambient temperature ( $r = -0.55$ ;  $p < 0.05$ ).

Physical exercise performed in elevated ambient temperature caused reduction in the antioxidant status by  $24.3\%$  ( $p < 0.05$ ) and

**Table 2. Changes in body mass (BM) after performing the exercise test and after sauna bathing in untrained men (CON) and athletes (A).**

| Variable (Mean $\pm$ SD) | Group               | Before           | After             | $\Delta$          |
|--------------------------|---------------------|------------------|-------------------|-------------------|
|                          | Exercise test/ CON/ | 72.51 $\pm$ 8.56 | 71.99* $\pm$ 8.46 | -0.52 $\pm$ 0.15  |
| BM (kg)                  | Exercise test/A/    | 67.78 $\pm$ 5.35 | 66.98* $\pm$ 5.36 | -0.8# $\pm$ 0.16  |
|                          | Sauna/CON/          | 72.99 $\pm$ 9.34 | 72.44* $\pm$ 9.30 | -0.55 $\pm$ 0.40  |
|                          | Sauna/A/            | 68.22 $\pm$ 5.46 | 67.27* $\pm$ 5.44 | -0.95# $\pm$ 0.28 |

\*Statistically significant differences at  $p < 0.05$  compared to the levels before sauna bathing and before the exercise test.

#Significant differences at the level of  $p < 0.05$  between A and CON.

^Statistical differences at the level of  $p < 0.05$  between exercise test and sauna bathing in the group A.

doi:10.1371/journal.pone.0085320.t002

**Table 3.** Changes in plasma volume (% $\Delta$ PV) in the groups CON and A after exercise test and after sauna bathing.

| Variable (Mean $\pm$ SD) | Group              | $\Delta$                      |
|--------------------------|--------------------|-------------------------------|
| % $\Delta$ PV            | Exercise test/CON/ | -8.0 $\pm$ 1.70               |
|                          | Exercise test/A/   | -10.5 <sup>#</sup> $\pm$ 3.20 |
|                          | Sauna/CON/         | -7.0 $\pm$ 3.30               |
|                          | Sauna/A/           | -10.2 <sup>#</sup> $\pm$ 3.30 |

<sup>#</sup>Statistically significant at  $p < 0.05$  A compared to CON.  
doi:10.1371/journal.pone.0085320.t003

more intensive ( $p < 0.05$ ) lipid peroxidation in the group of the untrained (Table 5). The changes observed in the group of athletes were: reduction in antioxidant status by 21.3% ( $p < 0.05$ ) and almost twice higher level of lipid peroxidation products ( $p < 0.05$ ). A negative relationship was also observed between reduction in the level of blood antioxidants in the trained men and the work done by them at elevated ambient temperature ( $r = -0.77$ ;  $p < 0.05$ ).

## Discussion

According to Kubica et al. [18] interindividual variability concerning the rate of core temperature rise is associated with exercise thermoregulation which determine ability to work in hot environments. Time to increase rectal temperature by 1.2°C is an indicator of exercise thermoregulatory mechanisms' efficiency [14]. In our study the time to increase rectal temperature by 1.2°C during exercise in the climatic chamber was longer in athletes than in untrained men. Total work performed by the athletes was significantly higher compared to untrained men which suggests greater efficiency of exercise thermoregulatory mechanisms. This indicates that running training regimes carried out for many years, in thermoneutral ambient conditions improved exercise thermoregulatory mechanisms. It has been reported that trained runners are characterized by high heat tolerance [19], which is further increased due to training [20], [21], [22].

Dehydration which is expressed by the decline in body mass observed in athletes, both after exercise in elevated ambient temperature and after sauna bathing, was significantly higher ( $p < 0.05$ ) than the dehydration observed in the untrained in both series of examinations. This suggests better thermoregulation in the first group. It is supported by an increased body water percentage, greater sweat rate and more advanced angiogenesis of large muscle groups. Intensive sweating during both examinations' series caused a greater decline in plasma volume ( $p < 0.05$ ) in athletes. This suggests their better adaptation to exercise in hot

environment and more effective heat elimination. Higher body mass loss and consequently more intensive dehydration observed after exercise in an elevated ambient temperature and after sauna bathing in athletes could have been connected with higher body water percentage and less fat tissue. Body fat percentage in the untrained men was higher while body mass loss caused by sweating was lower. It should be emphasized that endurance training causes an increase in body plasma volume [23].

During intensive exercise, mainly endurance type, the oxygen intake is increased by 10–20 times, while its consumption in tissues increases by 100–200 times compared to the conditions at rest [24]. The increase in the amount of reactive oxygen species (ROS) and reactive nitrogen species (RNS) in human body is caused by intensified intercellular metabolism rate [1], [7], [24]. Generation of ROS and RNS (i.e. RONS) promotes lipid peroxidation process, denaturation of proteins, inactivation of enzymes, modification of DNA and RNA, that create huge threat to proper functioning of cells causing the disturbance in their structure and function in human body [25]. An increased auto-oxidation of oxyhaemoglobin to methemoglobin during physical exercise is also conducive to ROS formation and leads to the impairment of the anti-oxidative blood system [26]. Haem and iron released during denaturation of haemoglobin are the factors activating free radical processes which disturb pro-oxidant-antioxidant balance during physical exercise [27], [28].

According to the examinations carried out by Vincent et al. [29], [30] it is sufficient to perform endurance training for five days in order to induce considerable improvement in both oxidative and anti-oxidative potential of skeletal muscles. Physical exercise might change the activity of antioxidant enzymes and it was demonstrated that these changes differ in tissues and organs. It was found that physical exercise has considerable effect on the activity of anti-oxidative enzymes in skeletal muscles and that these enzymes are more active in the muscles dominated by aerobic metabolism [31], [32]. The adaptive increase in anti-oxidative enzyme activity induced by training shows that body defence against RONS is more efficient in the people with better training status, which is suggested by correlations between activity of these enzymes in the muscles and  $VO_2\max$  [33]. Well-trained athletes with higher aerobic threshold exhibit higher blood antioxidant capacity [34]. This suggests that endurance training might be an important element to sustain and intensify the athlete's potential and to give the protection against oxidative stress [32], [35]. In our study similar to other authors [33], [34], [36], [37], it was observed that before exercise and sauna bath, the plasma antioxidant status in long distance runners was higher than in the untrained subjects.

Hyperthermia might intensify oxidative stress through decoupling of mitochondrial respiratory chain or through inhibiting anti-oxidative defence mechanisms. A considerable increase in

**Table 4.** Changes in concentration of lipid peroxidation products and antioxidant status in blood plasma in CON and A subjects during sauna bathing.

| Variable (Mean $\pm$ SD)                            | Group      | Before                          | After                           | $\Delta$                        |
|-----------------------------------------------------|------------|---------------------------------|---------------------------------|---------------------------------|
| Antioxidant status<br>( $\mu\text{mol.l}^{-1}$ )    | Sauna/CON/ | 200.57 $\pm$ 44.57              | 69.14 <sup>*</sup> $\pm$ 23.57  | -131.40 $\pm$ 49.64             |
|                                                     | Sauna/A/   | 250.25 <sup>#</sup> $\pm$ 44.58 | 198.25 <sup>#</sup> $\pm$ 23.57 | -52.00 <sup>#</sup> $\pm$ 36.14 |
| Peroxidation products<br>( $\mu\text{mol.l}^{-1}$ ) | Sauna/CON/ | 139.62 $\pm$ 52.53              | 193.25 <sup>*</sup> $\pm$ 66.28 | 53.62 $\pm$ 20.66               |
|                                                     | Sauna/A/   | 65.28 <sup>#</sup> $\pm$ 20.16  | 102.00 <sup>#</sup> $\pm$ 26.96 | 36.70 <sup>#</sup> $\pm$ 33.80  |

<sup>\*</sup>Statistically significant at  $p < 0.05$  compared to the levels before sauna bathing.

<sup>#</sup>Statistically significant at  $p < 0.05$  compared to the group CON.

doi:10.1371/journal.pone.0085320.t004

**Table 5.** Changes in concentration of lipid peroxidation products and antioxidant status in blood plasma in CON and A subjects during exercise test.

| Variable (Mean±SD)                                  | Group              | Before        | After          | Δ            |
|-----------------------------------------------------|--------------------|---------------|----------------|--------------|
| Antioxidant status<br>( $\mu\text{mol.l}^{-1}$ )    | Exercise test/CON/ | 220.42±49.50  | 166.85*±53.80  | -53.57±50.10 |
|                                                     | Exercise test/A/   | 242.40#±37.10 | 190.55*#±37.80 | -51.85±37.40 |
| Peroxidation<br>products ( $\mu\text{mol.l}^{-1}$ ) | Exercise test/CON/ | 113.17±42.57  | 183.00*±69.81  | 69.83±51.80  |
|                                                     | Exercise test/A/   | 67.20#±27.43  | 127.00*#±71.36 | 59.80±49.10  |

\*Statistically significant at  $p<0.05$  compared to the levels before exercise.

#Statistically significant at  $p<0.05$  A compared to CON.

doi:10.1371/journal.pone.0085320.t005

concentration of lipid peroxides was found in young men whose core temperature elevated to 39.5°C during performing 50% $\text{VO}_2$ -max treadmill exercise in a hot environment compared to the untrained men who performed the same exercise at a thermo-neutral temperature with the same oxygen uptake. Therefore, hyperthermia elevates oxidative stress and selectively affects specific oxidative markers, regardless of oxygen intake [38].

The exercise performed at elevated ambient temperature increases oxidative stress that accompanies physical work [39]. Furthermore, dehydration caused by exercise intensifies oxidative stress [40]. This was also confirmed in our study. Laitano et al. [41] demonstrated that submaximal exercise performed in a hot environment by young men increased oxidative stress, which was measured by changes in the activity of superoxide dismutase (SOD), glutathione (GSH), and glutathione disulfide (GSSG). The most noticeable changes in activity of these enzymes occurred in men, whose dehydration amounted to 3.5% of body mass loss compared to the group where re-hydration procedures were used.

Stressors activate mechanisms of defence against stress which first involve the following molecules:  $\alpha$ -tocopherol, ascorbic acid, glutathione, Q coenzyme, uric acid, superoxide dismutase, glutathione peroxidase and other compounds. They can also involve heat-shock proteins (HSP) released, among other things, from the liver as a response to stress. Due to the increased HSP levels induced by oxidative stress, these proteins are also reported to have an antioxidant effect [42], [43].

Increase in body temperature during sauna bathing leads to hyperventilation and increased oxygen intake [44]. Elevated blood oxygen concentration leads to elevated production of reactive oxygen species [45], [46], leading to disturbed pro-oxidant-antioxidant balance, which was observed in a study by Zinchuk and Zhadzko [46], who exposed athletes to a single and repeated sauna bathing sessions. These authors observed (after hyperthermia) an increase in nitrogen oxide synthesis in the subjects' higher concentration of nitrides/nitrites and elevated concentrations of lipid peroxidation products [46]. In our study, we also found a disturbed pro-oxidant-antioxidant balance after sauna bathing through increased concentration of lipid peroxidation products while reduced plasma antioxidant concentration in both athletes and untrained men.

The exercise training causes greater adaptation to oxidative stress due to the stimulation (through ROS) of transcription factors

NF- $\kappa$ B and AP-1 which control expression of over 100 genes, including antioxidant enzymes. Fehrenbach and Northoff [42] found that ROS are the molecules that also control activity of the HSF transcription factor which is responsible for the expression of HSP70, HSP72 and HSP90 proteins. This means that the stressors generated during exercise stimulate changes which lead to strengthening of defence against oxidative and thermal stress [42], [43], [47]. This pattern was noticeable in our experiment when comparing the antioxidant status and concentration of peroxidation products before and after sauna bathing. The athletes were characterized by higher level of antioxidant status and lower concentration of lipid peroxidation products. It was demonstrated for the first time that physical exercise at elevated temperature caused lower changes in the oxidative stress indices compared to passive overheating in sauna, with the same increase in core body temperature.

## Conclusions

The study demonstrated that:

1. Both passive and active overheating of human body led to disturbed pro-oxidant-antioxidant balance.
2. The athletes had initially higher antioxidant status level and lower plasma peroxidation products level compared to the untrained men, and, in both series, the disturbances of their pro-oxidant-antioxidant balance remained lower.
3. Oxidative stress differed depending on a thermal stressor. Physical exercise at elevated ambient temperature caused lower changes in the oxidative stress indices compared to sauna bathing.

## Author Contributions

Conceived and designed the experiments: WP ZS AKT. Performed the experiments: WP ZS AKT TP A. Tyka TC PP A. Teleglow. Analyzed the data: WP ZS AKT TP A. Tyka TC PP A. Teleglow. Contributed reagents/materials/analysis tools: WP ZS AKT TP A. Tyka TC PP A. Teleglow. Wrote the paper: WP TP. Revised the manuscript critically for important intellectual content: ZS AKT A. Tyka TC PP A. Teleglow.

## References

1. Powers SK, Jackson MJ (2008) Exercise-Induced Oxidative Stress: Cellular mechanisms and impact on muscle force production. *PhysiolRev* 88: 1243–1276.
2. Zembroń-Lacny A, Szyszka K (2002) Zaburzenia równowagi prooksydacyjno-antyoxydacyjnej wywołane laboratoryjnym testem wiosłarskim 2000 m. *Med Sport* 6 (2): 29–39.
3. Alessio HM, Hagerman AE, Fulkerson BK, Ambrose J, Rice RE, et al. (2000) Generation of reactive oxygen species after exhaustive aerobic and isometric exercise. *MedSci Sports Exerc* 32(9): 1576–1581.
4. Hübner-Woźniak E, Lutośławska G, Panczenko-Kresowska B, Pośnik J (2000) Spoczynkowe stężenie nadtlenków lipidowych w osoczu zredukowanego

- glutationu w krwinkach czerwonych u kobiet i mężczyzn trenujących biathlon. *Med Sport* 4 (4): 257–264.
5. Goto C, Higashi Y, Kimura M, Noma K, Hara K, et al. (2003) Effect of different intensities of exercise on endothelium-dependent vasodilation in humans: role of endothelium-dependent nitric oxide and oxidative stress. *Circulation* 108(5): 530–535. doi:10.1161/01.CIR.0000080893.55729. 28. PMID:12874192.
  6. Knez WL, Jenkins DG, Coombes JS (2007) Oxidative stress in half and full Ironman triathletes. *Med Sci Sports Exerc* 39(2): 283–288. doi:10.1249/01.mss.0000246999.09718.0c. PMID: 17277592.
  7. Zembroń-Lacny A, Szyszka K, Hübner-Woźniak E (1998) The pro-oxidant-antioxidant balance in the blood of middle – distance runners. *Biol Sport* 16: 51–59.
  8. Matsuo M, Kaneko T (2000) The chemistry of reactive oxygen species and related free radicals. In: *Free radicals in exercise and aging* (Radak Z, Eds). Hum Kin. Leeds 1–34.
  9. Sawka MN, Burke LM, Eichner ER, Maughan RJ, Montain SJ, et al. (2007) American College of Sports Medicine position stand. Exercise and fluid replacement. *Med Sci Sports Exerc* 39(2): 377–390. PMID:17277604.
  10. Paik IY, Jeong MH, Jin HE, Kim YI, Suh AR, et al. (2009) Fluid replacement following dehydration reduces oxidative stress during recovery. *BiochemBiophys Res Commun* 383(1): 103–107. doi:10.1016/j.bbrc.2009.03.135.
  11. Slaughter MH, Lohman TG, Boileau RA, Horswill CA, Stillman RJ, et al. (1988) Skinfold equations for estimation of body fatness in children and youth. *Hum Biol* 60(5): 709–723.
  12. DuBois D, DuBois EF (1916) Clinical calorimetry: a formula to estimate the appropriate surface area if height and weight be known. *Arch Internal Med* 17: 863–871.
  13. Nielsen B, Kubica R, Bonnesen A, Rasmussen IB, Stokłosa J, et al. (1981) Physical work capacity after dehydration and hyperthermia. *Scand J Sports Sci* 3(1): 2–10.
  14. Kubica R, Tyka A, Żuchowicz A, Czubała M (1996) Human acclimation to work in warm and humid environments. *J PhysiolPharmacol* 47: 515–524.
  15. Harrison MH (1985) Effects on thermal stress and exercise on blood volume in humans. *Physiol Rev* 65(1): 149–209.
  16. Woźniak-Grygiel E, Kochańska-Dziurawicz A, Stanjek-Cichoracka A (2007) Is it necessary to correct athletes hormones concentrations for plasma volume changes? *Med Sport* 11(4): 17–21.
  17. Kraemer RR, Brown BS (1984) Alterations in plasma-volume-corrected blood components of marathon runners and concomitant relationship to performance. *Eur J of ApplPhysiol* 55: 579–584.
  18. Kubica R (1979) Analiza wahań wydolności fizycznej, wywołanych zmianami ciepłoty ciała i modyfikacjami gospodarki wodno-elektrolitowej ustroju. *ActaPhysiol Pol* 30(19): 5–12.
  19. Piwonka RW, Robinson S, Gay VJ, Greninger L (1965) Preacclimatization of men to heat by training. *J ApplPhysiol* 20: 379–384.
  20. Gonzales-Alonso J, Teller C, Andersen SL, Jensen FB, Hyldig T, et al. (1999) Influence of body temperature in the development of fatigue during prolonged exercise in the heat. *J ApplPhysiol* 86(3): 1032–1039.
  21. Garrett AT, Goossens NG, Rehrer NJ (2009) Induction and decay of short-term heat acclimation. *Eur J ApplPhysiol* 107(6): 659–671.
  22. Wright HE, Selkirk GA, McLellan TM (2010) HPA and SAS responses to increasing core temperature during uncompensable exertional heat stress in trained and untrained males. *Eur J ApplPhysiol* 108(5): 987–997.
  23. Robergs R, Roberts S (2000) *Fundamental Principles of Exercise for Fitness. Performance and Health*. New York: McGraw-Hill Companies 134–152.
  24. McBridge JM, Kraemer WJ (1999) Free radicals, exercise and antioxidants. *J Strength Cond Res* 13: 175–183.
  25. Halliwell B (1994) Free radicals and antioxidants: a personal review. *Nutr Rev* 58: 253–265.
  26. Clemens M, Waller MD (1988) Lipid peroxidation in erythrocytes. *ChemPhys Lipids* 45: 251–268.
  27. Weiss ST (1998) Tissue destruction by neutrophils. *N Engl Med* 320: 365–375.
  28. Vandenboom R (2004) The myofibrillar complex and fatigue: a review. *Can J ApplPhysiol* 29: 330–356.
  29. Vincent HK, Powers SK, Demirel HA, Coombes JS, Naito H (1999) Exercise training protects against contraction induced lipid peroxidation in the diaphragm. *Eur J ApplPhysiolOccupPhysiol* 79: 268–273.
  30. Vincent HK, Powers SK, Stewart DJ, Demirel HA, Shanely RA, et al. (2000) Short-term exercise training improves diaphragm antioxidant capacity and endurance. *Eur J ApplPhysiol* 81: 67–74.
  31. Ji LL (1999) Antioxidants and oxidative stress in exercise. *ExpBiol Med* 222: 283–292.
  32. Leewenburgh C, Hollander J, Leichtweis S, Griffith M, Gore M, et al. (1997) Adaptation of glutathione antioxidant system oxidative-stress markers and delayed onset of muscle fiber specific. *Am J Physiol* 272: 363–369.
  33. Child RB, Wilkinson DM, Fallowfield JL (1999) Resting serum antioxidant status is positively correlated with peak oxygen uptake in endurance trained runners. *J Sports Med Phys Fitness* 39: 282–284.
  34. Ji LL, Hollander J (2000) Antioxidant defense: effects of aging and exercise. In: *Free radical in exercise and aging* (Radak Z, Eds). Hum Kin, Champaign, II: 35–72.
  35. Ji LL, Gomez-Cabrera MC, Vina J (2006) Exercise and Hormesis. Activation of cellular antioxidant signaling pathway. *Ann N Y AcadSci* 1067: 425–435.
  36. Bloomer RJ, Goldfarb AH (2004) Anaerobic exercise and oxidative stress: a review. *Can J ApplPhysiol* 29: 245–263.
  37. Bloomer RJ, Goldfarb AH, Wideman L, McKenzie MJ, Consitt LA (2005) Effects of acute aerobic and anaerobic exercise on blood markers of oxidative stress. *J Strength Cond Res* 19: 276–285.
  38. McAnulty SR, McAnulty L, Pascoc DD, Gropper SS, Keith RE, et al. (2005) Hyperthermia increases exercise-induced oxidative stress. *Int J Sports Med* 26(3): 188–92.
  39. Laitano O, Kalsi KK, Pook M, Oliveira AR, González-Alonso J (2010) Separate and combined effects of heat stress and exercise on circulatory markers of oxidative stress in euhydrated humans. *Eur J ApplPhysiol* 110(5): 953–60.
  40. Hillman AR, Vince RV, Taylor L, McNaughton L, Mitchell N, et al. (2011) Exercise-induced dehydration with and without environmental heat stress results in increased oxidative stress. *ApplPhysiolNutrMetab* 36: 698–706.
  41. Laitano O, Kalsi KK, Pearson J, Lotlikar M, Reischak-Oliveira A, et al. (2012) Effects of graded exercise-induced dehydration and rehydration on circulatory markers of oxidative stress across the resting and exercising human leg. *Eur J ApplPhysiol* 112(5): 1937–44.
  42. Fehrenbach E, Northoff H (2001) Free radical, exercise, apoptosis and heat shock proteins. *ExercImmunolRev* 7: 66–89.
  43. Jethon Z, Murawska-Ciałowicz E, Dzięgiel P, Podhorska-Okołów M (2005) Udział białek stresowych w adaptacji wysiłkowej. *Post BiolKom* 32: 697–706.
  44. Kukkonen-Harjula K, Kauppinen K (2006) Health effects and risks of sauna bathing. *Int J Circumpolar Health* 65(3): 195–205.
  45. Gore A, Muralidhar M, Espey MG, Degenhardt K, Mantell LL (2010) Hyperoxia sensing: from molecular mechanisms to significance in disease. *J Immunotoxicol* 7: 239–254.
  46. Zinчук V, Zhadzko D (2012) Sauna effect on blood oxygen transport and prooxidant-antioxidant balance in athletes. *Romanian Sports Medicine Society Med Sport* 8(3): 1883–1889.
  47. Powers SK, Talbert EE, Adhietty PJ (2011) Reactive oxygen and nitrogen species as intracellular signals in skeletal muscle. *J Physiol* 589 (9): 2129–2138. doi: 10.1113/jphysiol.2010.201327.
